# Supplementary material
Source: PubMed Central journal article supplement (PMC7843216)
Supplement: jci-131-140315-s132.pdf [file jci-131-140315-s132.pdf]

**Supplemental Figure 1**

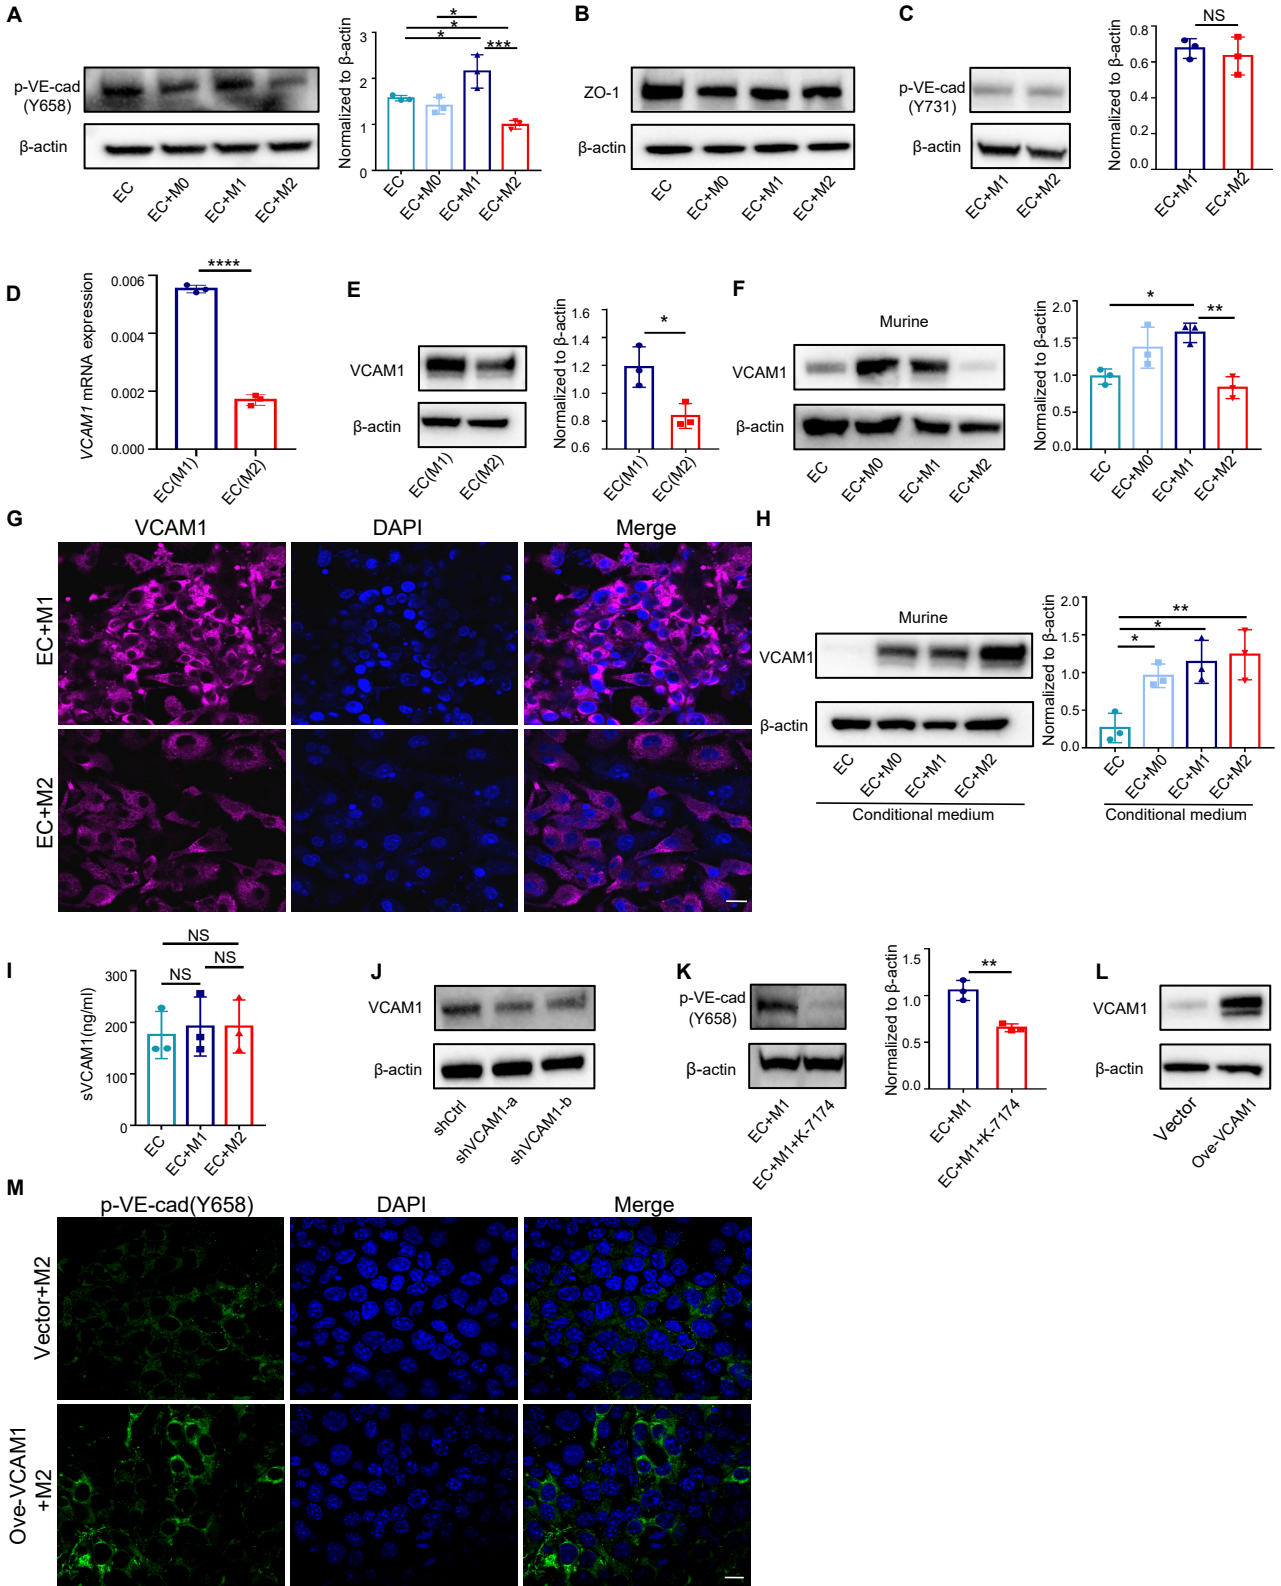

**Supplemental Figure 1. Decreased VCAM1 expression in ECs cocultured with M2 macrophages.** (A, B) The expression of the phosphorylation of VE-cadherin (p-VE-cad) at tyrosine 658 (A) and ZO-1 (B) in HUVECs cocultured with different subtypes of macrophages detected by western blot. A, n=3. (C) p-VE-cad at tyrosine 731 in HUVECs in different direct cocultures detected by western blot (n=3). (D, E) mRNA (D) and protein (E) levels of VCAM1 in HUVECs isolated from different direct cocultures (n=3). (F) The expression of VCAM1 in C166 ECs in different cocultures detected by western blot (n=3). (G) Localization of VCAM1 protein (purple) in C166 ECs from different cocultures by immunofluorescence analysis. DAPI stains cell nucleus. Scale bar: 20  $\mu$ m. (H) Expression of VCAM1 in C166 ECs in different transwell cocultures detected by western blot (n=3). (I) Soluble VCAM1 protein expression in the supernatant from different cocultures (n=3). (J) VCAM1 protein expression in HUVECs that were transiently transfected with VCAM1-specific shRNAs (shVCAM1-a, shVCAM1-b) or a control shRNA (shCtrl). (K) p-VE-cad expression in M1 macrophage-cocultured HUVECs treated with K-7174 (n=3). (L) VCAM1 protein expression in HUVECs that were transiently transfected with a VCAM1-specific vector (Ove-VCAM1) or a control vector. (M) Immunofluorescence analysis of p-VE-cad in M2 macrophage-cocultured C166 ECs with VCAM1 overexpressed. Scale bar: 20  $\mu$ m. Results represent three separate experiments. The results are shown as the mean  $\pm$  SD, \*  $p < 0.05$ , \*\*  $p < 0.01$ , \*\*\*  $p < 0.001$ , \*\*\*\*  $p < 0.0001$  and NS, not significant, as assessed by one-way ANOVA (A, F, H, I) and Student's t-test (C-E, K).

**Supplemental Figure 2**

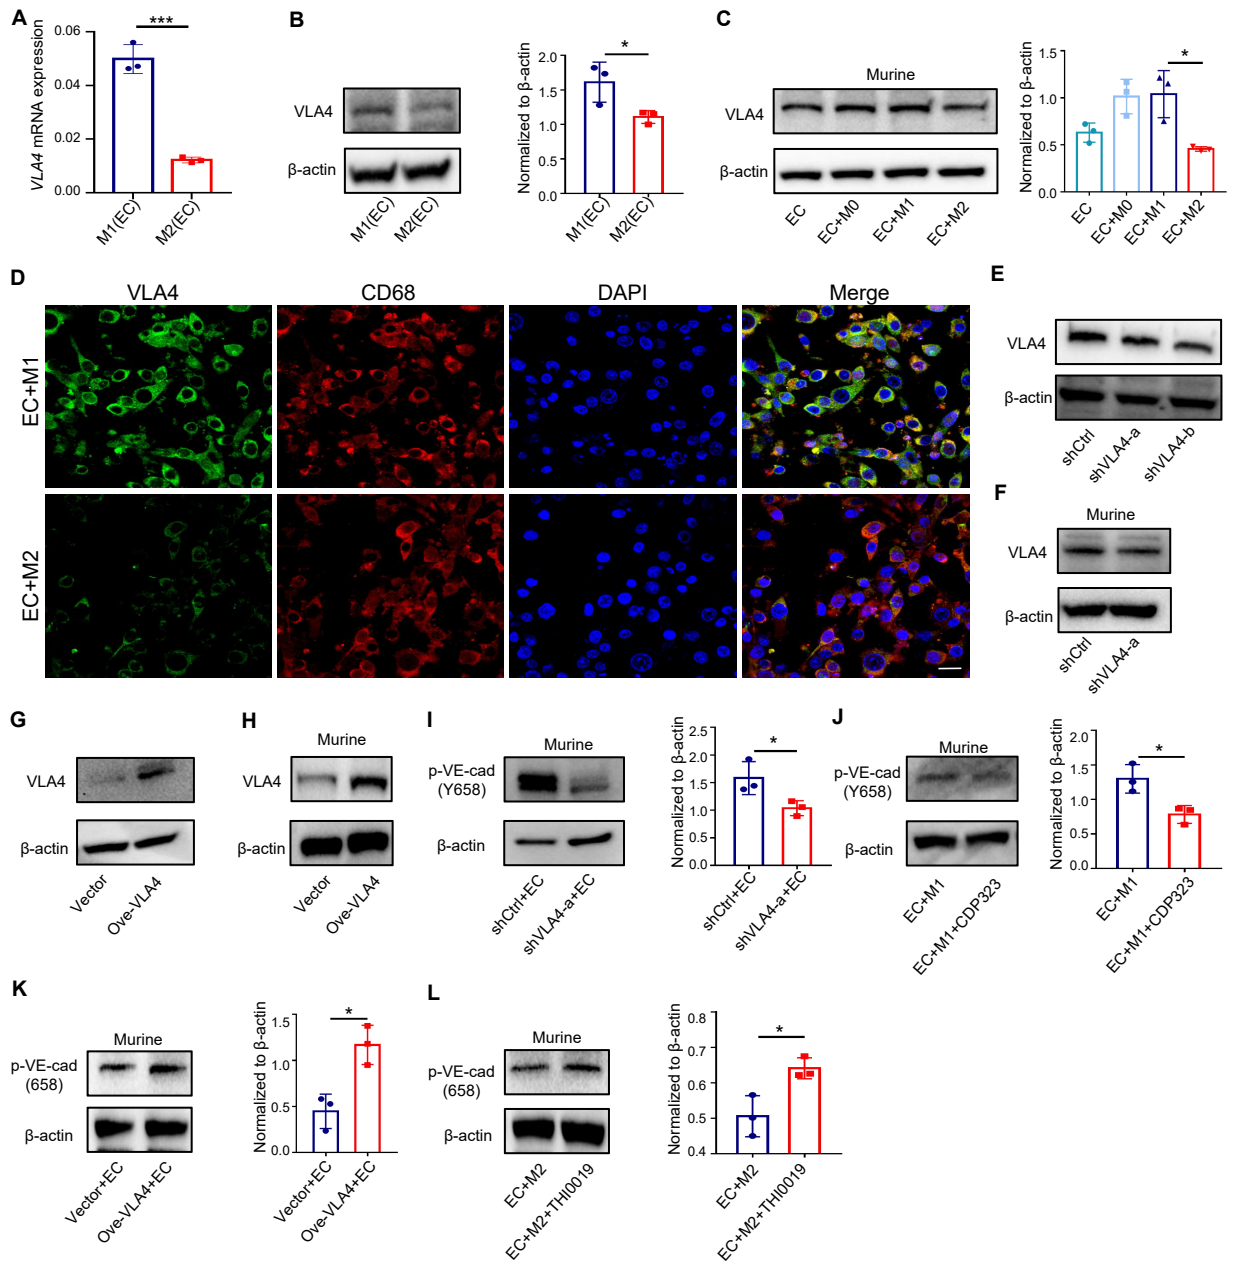

**Supplemental Figure 2. VLA4 dictates macrophage-mediated vascular permeability.** (A, B) mRNA (A) and protein (B) levels of VLA4 in macrophages isolated from different direct cocultures (n=3). (C) The expression of VLA4 in RAW264.7 detected by western blot in different cocultures (n=3). (D) Immunofluorescent analysis of VLA4 protein (green) in RAW264.7 macrophages (detected by CD68, red) from different cocultures. DAPI stains cell nucleus. Scale bar, 20  $\mu$ m. (E) VLA4 protein expression in THP-1 macrophages that were transiently transfected with VLA4-specific shRNAs (shVLA4-a, shVLA4-b) or a control shRNA (shCtrl). (F) VLA4 protein expression in RAW264.7 that were transiently transfected with a VLA4-specific shRNA (shVLA4-a) or a control shRNA (shCtrl). (G, H) VLA4 protein expression in THP-1 (G) or RAW264.7 (H) that were transiently transfected with a VLA4-specific vector (Ove-VLA4) or a control vector. (I, J) p-VE-cad expression in C166 ECs cocultured with RAW264.7 that were transiently transfected with a VLA4-specific shRNA (shVLA4-a) or a control shRNA (shCtrl) (I), or with M1 macrophages treated with CDP323 (J) (n=3). (K, L) p-VE-cad expression in C166 ECs cocultured with macrophages that were transiently transfected with a VLA4-specific vector (Ove-VLA4) or a control vector (K), or with M2 macrophages treated with THI0019 (L) (n=3). Results represent three separate experiments. The results are shown as the mean  $\pm$  SD, \* p< 0.05, \*\*\* p < 0.001, as assessed by one-way ANOVA (C) and Student's t-test (A, B, I-L).

**Supplemental Figure 3**

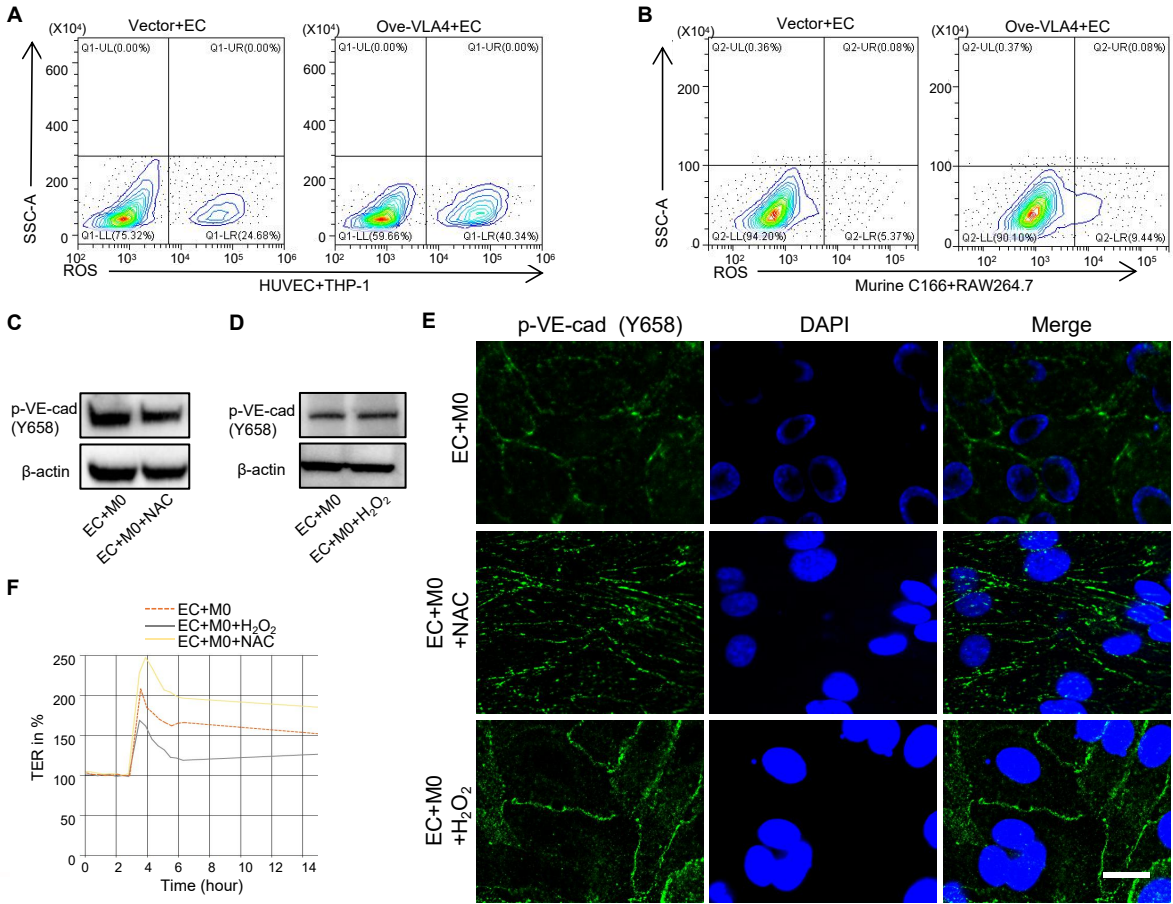

**Supplemental Figure 3. ROS functions downstream of VLA4 to regulate macrophage-mediated permeability.** (A, B) Flow cytometric analysis of ROS levels in HUVECs (A) or C166 ECs (B) cocultured with macrophages that were transiently transfected with a VLA4-specific vector (Ove-VLA4) or a control vector. (C, D) Immunoblot analysis of p-VE-cad in HUVECs from M0 macrophage-cocultured system treated with NAC (C) or H<sub>2</sub>O<sub>2</sub> (D). (E) Immunofluorescence staining of p-VE-cad in HUVECs from M0 macrophage-cocultured system treated with NAC and H<sub>2</sub>O<sub>2</sub>. Scale bar, 20 μm. (F) Effects of NAC or H<sub>2</sub>O<sub>2</sub> treatment on HUVEC barrier cocultured with M0 macrophages measured in real-time using the automated system (CellZscope®). Results represent three separate experiments.

**Supplemental Figure 4**

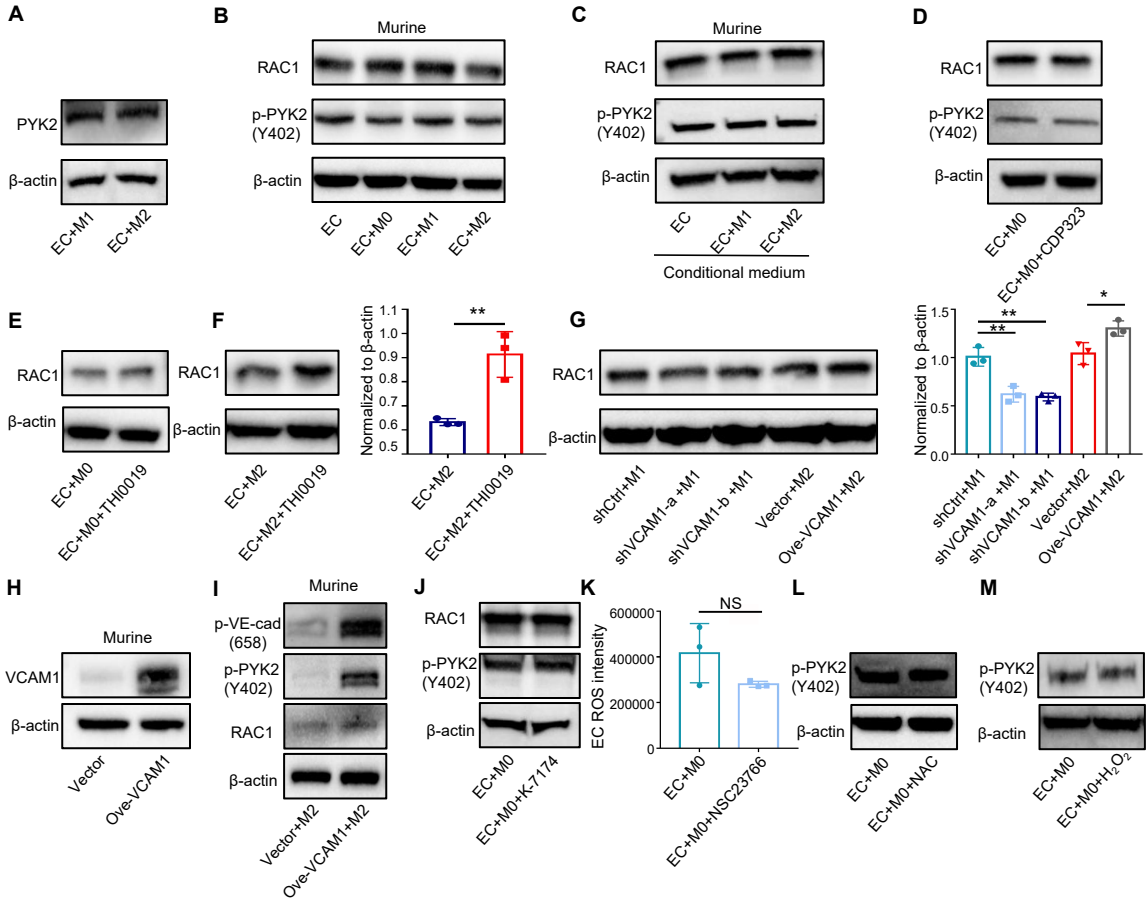

**Supplemental Figure 4. RAC1 expression and phosphorylated PYK2 in different cocultures.** (A) Protein levels of total PYK2 in HUVECs from different cocultures examined by western blot. (B) Protein levels of murine RAC1 and phosphorylated PYK2 (p-PYK2) in C166 ECs from different cocultures examined by western blot. (C) Protein levels of p-PYK2 and RAC1 in C166 ECs from different transwell cocultures examined by western blot. (D) RAC1 and p-PYK2 protein expression in HUVECs from M0 macrophage-cocultured system treated with CDP323. (E, F) RAC1 protein expression in HUVECs from M0 (E) or M2 (F) macrophage-cocultured system treated with THI0019. F, n=3. (G) RAC1 protein expression in M1 macrophages cocultured HUVECs that were transiently transfected with VCAM1-specific shRNAs (shVCAM1-a, shVCAM1-b) or a control shRNA (shCtrl) and in M2 macrophages cocultured HUVECs that were transiently transfected with a VCAM1-specific vector (Ove-VCAM1) or a control vector (n=3). (H) Expression of murine VCAM1 in C166 ECs that were transiently transfected with a VCAM1-specific vector (Ove-VCAM1) or a control vector. (I) Murine p-VE-cad, p-PYK2 and RAC1 protein expression in C166 ECs overexpressing VCAM1 cocultured with M2 macrophages. (J) RAC1 and p-PYK2 expression in HUVECs from M0 macrophage-cocultured system treated with K-7174. (K) Flow cytometric analysis of ROS levels in HUVECs from M0 macrophage-cocultured system treated with RAC1 inhibitor, NSC23766 (n=3). (L, M) p-PYK2 expression in HUVECs from M0 macrophage-cocultured system treated with NAC (L) or from M2 macrophage-cocultured system treated with H<sub>2</sub>O<sub>2</sub> (M). Results represent three separate experiments. The results are shown as the mean  $\pm$  SD, \* p < 0.05, \*\* p < 0.01, and NS, not significant, as assessed by one-way ANOVA (G) and Student's t-test (F, K).

## Supplemental Figure 5

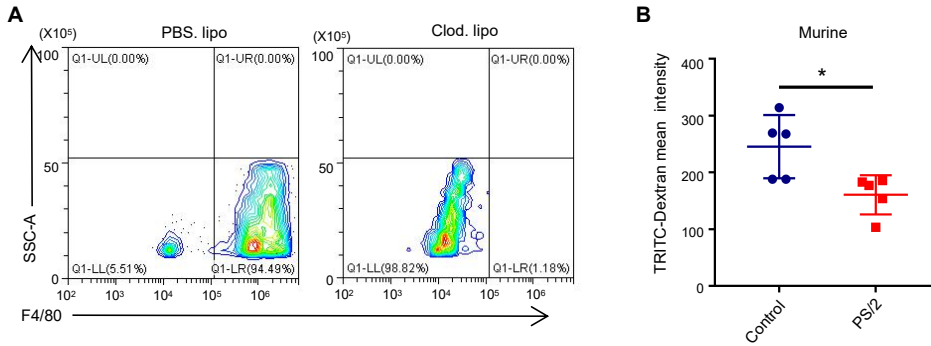

**Supplemental Figure 5. Validation of macrophage depletion and peritoneal permeability treated with PS/2.** (A) Representative graphs demonstrating the efficiency of macrophages depletion assessed by flow cytometry. Results represent three separate experiments. (B) Peritoneal permeability 48 hours after injection of PS/2-treated or control antibody IgG2b-treated macrophages in mice peritoneum (n=5). The results are shown as the mean  $\pm$  SD, \*  $p < 0.05$ , as assessed by Student's t-test (B).



**Supplemental Figure 6**

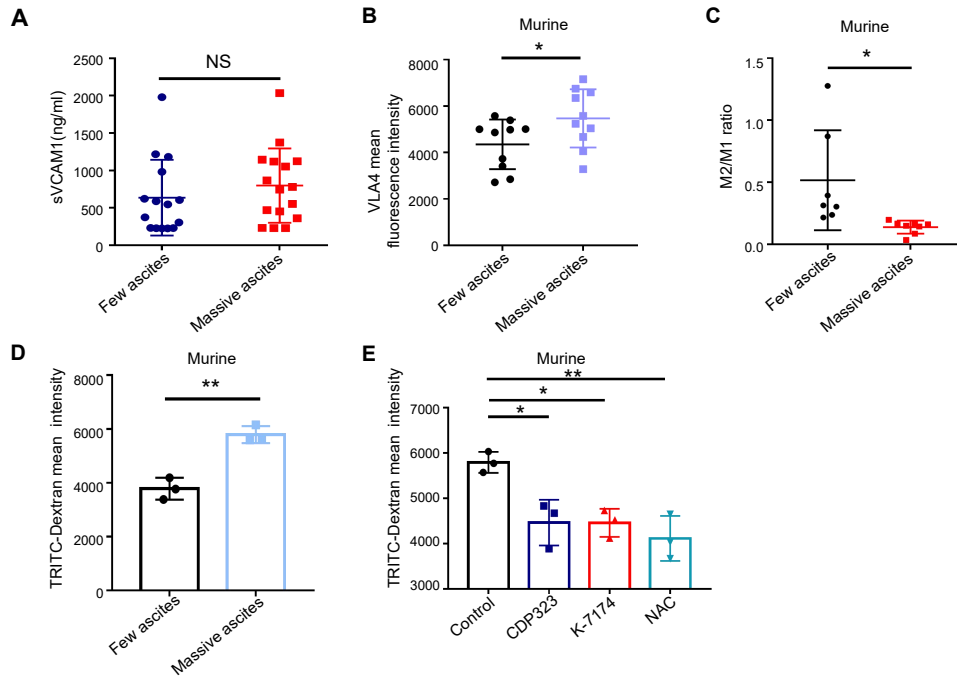

**Supplemental Figure 6. VLA4 expression is correlated with ascites volume.** (A) Soluble VCAM1 expression in different ovarian cancer ascites (n=15 for Few ascites, n=16 for Massive ascites). (B, C) VLA4 expression (B) and M2/M1 ratio (C) in murine peritoneal macrophages isolated from ascites. B, n=10. C, n=7 for Few ascites (less than 2 ml), n=8 for Massive ascites (more than 2 ml). (D) TRITC-Dextran permeability in C166 ECs cocultured with macrophages isolated from different ovarian cancer ascites (n=3). (E) TRITC-Dextran permeability in C166 ECs cocultured with macrophages isolated from ovarian cancer ascites treated with CDP323, K-7174, and NAC (n=3). The results are shown as the mean  $\pm$  SD, \* $p < 0.05$ , \*\*  $p < 0.01$ , and NS, not significant, as assessed by one-way ANOVA (E) and Student's t-test (A-D).

## Supplemental Figure 7

A

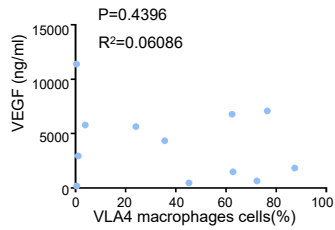

**Supplemental Figure 7. VLA4 expression has no correlation with VEGF expression in ascites.** (A) Correlation between VEGF and VLA4 expression in macrophages of OC patients' ascites (n=12). R<sup>2</sup> value and P value were calculated based on the analysis of Pearson's correlation.

## Supplemental Table 1

**Supplemental Table 1. Clinical characteristics of the 32 OC patients**

| <b>Patient characteristics</b>           | <b>Cohort 1</b> | <b>Cohort 2</b> |
|------------------------------------------|-----------------|-----------------|
| No. of patients                          | 20              | 12              |
| Age, years (median, range)               | 53, 42-68       | 51, 45-63       |
| Tumor size, cm ( $\leq 5$ / $> 5$ )      | 14/6            | 10/2            |
| TNM stage (I+II/III+IV)                  | 9/11            | 5/7             |
| metastasis (no/yes)                      | 12/8            | 11/1            |
| Ascites volume<br>(Few/Moderate/Massive) | 10/0/10         | 4/4/4           |

**Note:** Patients in ovarian cancer cohort 1 contributed fresh samples for FACS that were used in analyses of cell ratio, and correlation; patients in ovarian cancer cohort 2 contributed to the paraffin-embedded samples for IF that were used in analyses of VLA4 expression.

## Supplemental Table 2

**Supplemental Table 2. Antibodies used in experiments**

| <u>Antibody</u>                                        | <u>Catalog/Clone #</u> | <u>Supplier</u> |
|--------------------------------------------------------|------------------------|-----------------|
|                                                        | <u>Immunoblotting</u>  |                 |
| <u>Rabbit anti-Integrin alpha<br/>4/CD49D antibody</u> | <u>EPR1355Y</u>        | <u>abcam</u>    |
| <u>Rabbit anti-VCAM1<br/>antibody</u>                  | <u>EPR5047</u>         | <u>abcam</u>    |
| <u>Anti-phospho-pyk2<br/>Polyclonal Antibody</u>       | <u>bs-3400R</u>        | <u>Bioss</u>    |

|                                                         |                     |                                     |
|---------------------------------------------------------|---------------------|-------------------------------------|
| <u>Rabbit Anti-PYK2 antibody</u>                        | <u>YE353</u>        | <u>abcam</u>                        |
| <u>Phospho-VE-cadherin (Tyr731) Polyclonal Antibody</u> | <u>44-1145G</u>     | <u>Invitrogen</u>                   |
| <u>Phospho-VE-cadherin (Tyr658) Polyclonal Antibody</u> | <u>44-1144G</u>     | <u>Invitrogen</u>                   |
| <u>Anti-ZO1 tight junction antibody</u>                 | <u>EPR19945-296</u> | <u>abcam</u>                        |
| <u>Purified Mouse Anti-Rac1 antibody</u>                | <u>102/Rac1</u>     | <u>BD Transduction Laboratories</u> |
| <u>Mouse experiments</u>                                |                     |                                     |
| <u>InVivoMAb anti-mouse/human VLA4 (CD49d)</u>          | <u>PS/2</u>         | <u>Bio X Cell</u>                   |
| <u>InVivoMAb rat IgG2b isotype control</u>              | <u>LTF-2</u>        | <u>Bio X Cell</u>                   |
| <u>Flow cytometry</u>                                   |                     |                                     |
| <u>PE/Cy7 anti-mouse CD45</u>                           | <u>HI30</u>         | <u>biolegend</u>                    |
| <u>APC/Cyanine7 anti-mouse F4/80 Antibody</u>           | <u>BM8</u>          | <u>biolegend</u>                    |
| <u>APC anti-mouse CD86 Antibody</u>                     | <u>GL-1</u>         | <u>biolegend</u>                    |
| <u>PE anti-mouse CD206 (MMR) Antibody</u>               | <u>C068C2</u>       | <u>biolegend</u>                    |
| <u>Brilliant Violet 421™ anti-human CD206 (MMR)</u>     | <u>15-2</u>         | <u>biolegend</u>                    |

|                                                       |               |                                     |
|-------------------------------------------------------|---------------|-------------------------------------|
| <u>ITGA4 monoclonal antibody (44H6),FITC</u>          | <u>44H6</u>   | <u>Invitrogen</u>                   |
| <u>PerCP/Cy5.5 anti-mouse/human CD11b</u>             | <u>M1/70</u>  | <u>biolegend</u>                    |
| <u>PerCP/Cy5.5 anti-human CD11b</u>                   | <u>ICRF44</u> | <u>biolegend</u>                    |
| <u>PE/Cyanine7 anti-human CD45 Antibody</u>           | <u>2D1</u>    | <u>biolegend</u>                    |
| <u>Brilliant Violet 605 anti-human CD49d Antibody</u> | <u>9F10</u>   | <u>biolegend</u>                    |
| <u>APC anti-human CD14 Antibody</u>                   | <u>63D3</u>   | <u>biolegend</u>                    |
| <u>PE Mouse Anti-Human CD29</u>                       | <u>MAR4</u>   | <u>BD Transduction Laboratories</u> |
| <u>PerCP/Cyanine5.5 anti-human CD86 Antibody</u>      | <u>BU63</u>   | <u>biolegend</u>                    |
